# Supplementary material for: A dynamic model of transmission and elimination of peste des petits ruminants in Ethiopia
Source: PubMed Central journal article supplement — Proc Natl Acad Sci U S A. 2018 Jul 27;115(33):8454–9. doi: 10.1073/pnas.1711646115 (PMC6099864; doi:10.1073/pnas.1711646115), 2018-07-27
Supplement: pnas.1711646115.sapp.pdf [file pnas.1711646115.sapp.pdf]

Transmission and elimination of Peste des Petits Ruminants in Ethiopia: insights from a  
dynamic model

Guillaume Fournié, Agnès Waret-Szkuta, Anton Camacho, Laike M. Yigezu, Dirk U.  
Pfeiffer, François Roger

**Supporting Information**

Further information are provided about the data, the model and its parameter values. The results of a sensitivity analysis exploring the impact of variation in fixed parameter values on transmission parameter estimates are also presented.

**Data**

**Small ruminant population.** The number of sheep and goats in the highlands were derived from the 2001-2002 Agricultural census (1). However, this census was incomplete for Afar and Somali regions, for which the small ruminant population was estimated as described by Behnke et al (2010) (2). According to the 2006 Livestock Development Master Plan Study, Afar and Somali, accounted altogether for 34.6% and 43.2% of the national sheep and goat populations, respectively. Assuming that these figures remained stable from 2002 to 2006, the number of sheep and goats in the lowlands was estimated by multiplying the respective highland population sizes by  $0.346/(1-0.346)$  and  $0.432/(1-0.432)$ , respectively. The numbers of sheep and goats were estimated to be 14.2 and 12.9 million in the highlands, respectively, and 7.5 and 9.8 million in the lowlands, respectively. There were thus 27.2 million small ruminants in the highlands and 17.4 million in the lowlands.

**Number of villages.** We first estimated the number of villages in pastoral and sedentary areas by quantifying the number of kebeles, and the number of villages per kebele, in each area. Kebeles, or sub-districts, are Ethiopia's lowest administrative division level. They have

been described as comprising of about 5000 people (3, 4). In (5), the number of kebeles in 2007 was provided for seven regions (Tigray, Afar, Amhara, Oromia, Benishangul-Gumuz, SNNPR and Gambella). Using the 2007 census data, the average number of people per kebele was 4263. The census estimated the population to be about 53.5 million in 1994 and 73.75 million in 2007 (6). Through linear extrapolation, the human population in 1999, the year of the PPR serological survey, was estimated to be 61.3 million. An average of 4000-5000 people per kebele would then mean 12,000-15,000 kebeles in the whole country. As 84% of the human population was rural, the number of rural kebeles would then range between 10,000-13,000. Other references suggested higher numbers of kebeles: about 30,000 for the whole country (i.e. 2043 people/kebele) (4), thus 25,000 in rural areas. The figure of 21,000 rural kebeles was mentioned (i.e. 2452 people/kebele) in another reference (7). The average number of villages per kebele varied from 10 to 30 according to different sources (3, 4, 8). Assuming that the number of kebeles in rural Ethiopia ranged from 10,000 to 25,000, and the average number of villages per kebele from 10 to 30, then the actual number of villages would range from 100,000 to 750,000. The average village population size would then range between 69 and 515 inhabitants.

In addition, we estimated the number of villages based on surveys which estimated village population sizes. A census conducted in 39 villages in Oromia region, estimated an average of 1660 people per village (9). The 1994 Ethiopian Rural Household Survey covered 1477 households in 15 villages across Ethiopia (10). Assuming an average household size of 6.6 people (11), this would mean an average of at least 650 people per village. With an average of 650-1500 people per village, the number of villages in rural Ethiopia would range between 34,000 and 80,000. Discrepancies between these estimates may result from the definition of a “village”. Indeed, a got, a kebele sub-structure, can be described either as a village (5) or as a

group of 3-5 villages, potentially creating confusion, as the distinction between both units is unclear in the field (12).

Eight percent of the rural Ethiopian population were in Afar and Somali regions according to the 2007 census. Therefore, assuming that the average size of a village would be the same in highlands as in lowlands, there would 11 times as many villages in highlands as villages in lowlands (6). However, the size of households and villages may vary according to regions (11). For instance, while an average 4.9 people formed a rural household in Ethiopia according to the 2007 census, this figure reached 6.4 for Afar and Somali regions according to the same census (6), and it was even estimated to be 8.1 in Somali according to another survey (11). Given the uncertainty about the number of villages to be considered, several scenarios were explored, assuming different numbers of villages and different ratios between the number of villages in lowland and highland areas (Table S3).

**Serological survey.** The sampling was multistage, with regions, weredas (third administrative division level), kebeles (fourth administrative division level) and villages as the first, second, third and fourth sampling units, respectively. Within each village, 20 small ruminants were supposed to be sampled. Sera were analysed using a competitive ELISA test. The survey has been described in more details by Waret-Szkuta et al. (12). A total of 13,651 animals were sampled. As 99.1% of the 4648 samples for which the animal age was recorded were from adults (i.e. >1yo), we assumed that all other samples were also from adults, and discarded the 41 samples collected from young animals. The classification of adults into further age categories was not performed reliably, therefore, serological age profiles could not be assessed. We also discarded 38 samples for which their geographical origin was unknown. This left 13,572 samples for the analysis. The kebele of origin was specified for 68.4% (9287/13572) of samples. As an average of 40 samples were collected in identified kebeles, and 82.3% (191/232) of identified kebeles counted 40 or fewer samples, samples for

which the kebele was unknown were randomly grouped, with respect to their wereda of origin, so that each group included 40, or fewer, samples. For instance, if 115 samples were collected in a given wereda and their kebele of origin was unknown, 40 samples were randomly attributed to kebele A, 40 samples to kebele B, and the remaining 35 samples to kebele C. These simulations were repeated 1000 times, and resulted in very small variation in the distribution of kebeles according to their seroprevalence (Table S1). The village of origin was specified for only 7.2% (980/13572) of samples. Within a given kebele, the number of sampled villages, and, within these villages, the number of sampled animals were obtained by dividing the number of samples by 20, as 20 samples were supposed to be collected in each village. The quotient of the Euclidian division corresponded to the number of villages within which 20 samples were collected, and the remainder to the number of animals (<20) sampled in an additional village. For instance, if 108 samples were collected from a given kebele, 20 animals were sampled in 5 villages, and 8 animals in an additional sixth village. Overall, 91.6% (643/702) of villages had serological results for 20 animals. The sample sizes for each surveyed village are reported in Tables S6-7.

## **Model**

**PPRV transmission within a village.** The viral dynamics within a village was explored using a stochastic model. Transitions between compartments were modelled as binomial processes. For instance, the number of young small ruminants being infected between time  $t$  and  $t+\tau$  was given by a binomial process with the number of young small ruminants that survived between time  $t$  and  $t+\tau$  as the number of trials, and the risk of infection  $\lambda_{r,i,t}$  as the probability of success. The number of young animals entering into the village population at time  $t$  was generated through a Poisson process with parameter  $b_{r,i,t}$ . Using baseline parameters (Table S2), a PPRV incursion caused an epidemic followed by extinction for all

possible values of  $\beta_r^w$ ,  $N_r$  and  $\rho$ . In other words, PPRV dynamics in a village was epidemic, and did not result in endemicity. Under a scenario assuming a much higher turn-over of the village population ( $\kappa = 0.49$ , Table S2), viral endemicity within a village was only possible for the maximal value of  $N_r$  ( $N_r = 3473$ ),  $\rho < 0.8$  and  $\beta_r^w$  approaching the upper bound of its prior distribution, 10. However, the probability of an epidemic resulting in viral endemicity within a village was very low, only peaking at 0.7% for  $N_r = 3473$  and  $\beta_r^w = 10$ . When accounting for a refractory period – i.e. adults recovering from infection only contributed again to new births after a fixed period of time as PPR caused abortions – PPRV could not become endemic within a village under any parameter scenario.

**Simulation of the serological survey.** During the field serological survey, a total number of  $K_r$  kebeles,  $K_{r=L} = 79$  and  $K_{r=H} = 268$ , and  $W_r$  villages,  $W_{r=L} = 120$  and  $W_{r=H} = 582$  (Table S1), were selected in each region  $r$ . Let's  $V_{r,k}$  be the number of villages surveyed in a selected kebele  $k$  (with  $k \in \{1, \dots, K_r\}$ ), and  $A_{r,k,v}$  the number of animals sampled in a village  $v$  (with  $v \in \{1, \dots, V_{r,k}\}$ ) in kebele  $k$  in region  $r$ . At the end of each simulation, the serological survey was reproduced in each region  $r$  through the following algorithm:

- (1) Initialise a vector  $M$  of integers, of size  $n_r$ ,  $M = \{1, \dots, n_r\}$ , with  $n_r$  being the number of villages in region  $r$ .
- (2) Set the kebele indicator  $k = 1$  and village indicator  $v = 1$ .
- (3) Randomly select a value  $i$  from  $M$ .  $i$  now refers to the *simulated* village which is paired with the *surveyed* village  $v$  in kebele  $k$ .
- (4) Simulate the sampling of  $A_{r,k,v}$  animals in the simulated village  $i$ , and count the number  $a$  of immune animals among them. This is achieved through a hypergeometric process  $H(A_{r,k,v}, R_{r,i,a=2}, N_{r,i,a=2})$ , with  $N_{r,i,a=2}$  and  $R_{r,i,a=2}$  being the number of adults and immune adults in the simulated village.

- (5) Simulate the number of animals  $p$  which tested positive. This is the sum of the number of true and false positives generated through the respective binomial processes  $B(a, Se)$  and  $B(A_{r,k,v} - a, 1 - Sp)$ , with  $Se$  and  $Sp$  being the laboratory test sensitivity and specificity.
- (6) Compute the cumulated number of tested ( $T$ ) and positive ( $P$ ) animals in kebele  $k$ :
- If  $v=1$ ,  $T = A_{r,k,v}$  and  $P = p$
  - If  $v>1$ , set  $T$  to  $T + A_{r,k,v}$  and  $P$  to  $P + p$
- (7) Remove the value  $i$  from vector  $M$ .
- (8) Depending on the value of  $v$ :
- If  $v = V_{r,k}$ , compute the simulated apparent seroprevalence for kebele  $k$ :  $P/T$ , set the kebele indicator  $k$  to  $k+1$  and village indicator  $v=1$ .
  - If  $v < V_{r,k}$ , set the village indicator  $v$  to  $v+1$ .
- (9) If  $k = K_r$  and  $v = V_{r,k}$ , go to (10), if not, return to (3).
- (10) Compute the proportion of kebeles for which the simulated apparent seroprevalence falls within the following ranges: [0%-5%[, [5%-10%[, [10%-20%[, [20%-30%[, [30%-40%[, [40%-50%[, [50%-100%].

**ABC-SMC algorithm.** The algorithm started with drawing a set of parameter values – or particle – from the prior distributions. The particle served as model input to generate a simulated dataset, which was then compared to the observed dataset using a set of summary statistics, as detailed in the manuscript. If all the distances  $d_{1,L}$ ,  $d_{1,H}$ ,  $d_{2,L}$  and  $d_{2,H}$  between the simulated and observed summary statistics were below pre-defined tolerance thresholds  $\varepsilon_{1,L}$ ,  $\varepsilon_{1,H}$ ,  $\varepsilon_{2,L}$  and  $\varepsilon_{2,H}$ , the particle was accepted, otherwise it was rejected. This procedure was repeated until 2000 particles were accepted. These 2000 particles formed an intermediate

distribution, in which each particle was weighted according to its probability of having been sampled, as defined in (13). A new sequence then started by drawing a particle from this intermediate distribution. Each of its parameter values was perturbed by adding to each of them a value randomly drawn from a uniform distribution  $U[-\varphi\chi_i, \varphi\chi_i]$ , where  $\varphi = 0.2$  was the intensity of the perturbation and  $\chi_i$  was the range of the marginal distribution of the parameter  $i$  in the intermediate distribution. Instead of having a fixed value for  $\varphi$ , an alternative would be to define the value of  $\varphi$  for each ABC-SMC sequence and parameter in order to ensure that the variance of the perturbation kernel was always twice as high as the variance of the intermediate marginal posterior distribution, as suggested by Beaumont (38). This approach and its results are presented in “Intensity of the perturbation” paragraph in the Sensitivity analysis section. If the prior probability of the perturbed particle was zero (i.e. at least one of its perturbed parameter values fell outside the range of their respective prior distributions), the process was repeated (i.e. drawing a particle and perturbing it) until obtaining a perturbed particle with a non-zero prior probability. Each tolerance threshold  $\varepsilon$  was automatically lowered to the sixtieth ( $\varepsilon_{1,L}$  and  $\varepsilon_{2,L}$ ) or eightieth ( $\varepsilon_{1,H}$  and  $\varepsilon_{2,H}$ ) percentiles of its distribution at the previous sequence. This new sequence ended when 2000 particles were accepted. New sequences were thus repeated, until predictive distributions generated by simulations reached an acceptable agreement with the observations (14), and further sequences did not further improve the model goodness-of-fit. The output of the final sequence was an approximation of the joint posterior distribution (13). Convergence of the posterior distribution and convergence towards the observed summary statistics were checked visually (15).

For any sequence  $s$ , the weight  $w_s^{(i)}$  of a particle  $\theta_s^{(i)}$  was defined as (13):

$$w_s^{(i)} = \frac{\pi(\theta_s^{(i)})}{\sum_{j=1}^{n=2000} w_{s-1}^{(j)} K(\theta_{s-1}^{(j)}, \theta_s^{(i)})}$$

With  $\pi(\theta_s^{(i)})$  being the prior probability of a given particle, and  $K(\theta_{s-1}^{(j)}, \theta_s^{(i)})$  the probability density for generating  $\theta_s^{(i)}$  from a particle  $\theta_{s-1}^{(j)}$ . Given that all priors and perturbation kernels were uniform distributions, weights could be calculated as:

$$w_s^{(i)} = \frac{1}{\sum_{j=1}^{n=2000} w_{s-1}^{(j)} \mathbf{1}(\theta_{s-1}^{(j)}, \theta_s^{(i)})}$$

With  $\mathbf{1}(\theta_{s-1}^{(j)}, \theta_s^{(i)})$  being an indicator function equal to 1 if  $\theta_s^{(i)}$  could have been generated by  $\theta_{s-1}^{(j)}$  (i.e. each parameter value of  $\theta_s^{(i)}$  was included within the range defined by the uniform perturbation kernel around the corresponding parameter value of  $\theta_{s-1}^{(j)}$ ), and 0 if not.

The weights were normalised, and the effective sample size (ESS) computed as follows (15):

$$\overline{w_s^{(i)}} = \frac{w_s^{(i)}}{\sum_{j=1}^{n=2000} w_s^{(j)}}$$

$$ESS = \frac{1}{\sum_{i=1}^{n=2000} \left( \overline{w_s^{(i)}} \right)^2}$$

For all intermediate sequences, the ESS was higher than 900 for 2000 particles.

**Village-level reproduction number.** The posterior predictive values of the village-level reproduction numbers were computed as follows. Consider a village in region  $r$ . It was infected at time  $t=0$ , causing an epidemic within the village.  $N_{a,t}$  and  $I_{a,t}$  were the total number of animals and the number of infected animals in age category  $a$  at time  $t$  in this village, respectively. The probability that this village did not infect any animal in another village within the same region  $r$  at time  $t$  was:



$$\exp \left[ -\beta_{rr}^b \frac{N_r \sum_a I_{a,t}}{(n_r - 2)N_r + \sum_a N_{a,t}} \right]$$

Where  $n_r$  was the number of villages in region  $r$ , and  $N_r$  the number of animals in a village in the absence of disease (i.e. all animals were susceptible). The probability that at least one animal was infected in a given village within the same region throughout the course of the epidemic in the primary infected village was, therefore:

$$1 - \int_{t=0}^{t=\infty} \exp \left[ -\beta_{rr}^b \frac{N_r \sum_a I_{a,t}}{(n_r - 2)N_r + \sum_a N_{a,t}} \right] dt$$

The expected number of villages in region  $r$  infected by an infected village in the same region was given by:

$$r_{rr} = (n_r - 1) \left( 1 - \int_{t=0}^{t=\infty} \exp \left[ -\beta_{rr}^b \frac{N_r \sum_a I_{a,t}}{(n_r - 2)N_r + \sum_a N_{a,t}} \right] dt \right)$$

The expected number of villages in region  $r$  infected by an infected village in region  $k$  (with  $k \neq r$ ) was given by:

$$r_{kr} = (n_r - 1) \left( 1 - \int_{t=0}^{t=\infty} \exp \left[ -\beta_{kr}^b \frac{N_r \sum_a I_{a,t}}{(n_k - 1)N_k + \sum_a N_{a,t}} \right] dt \right)$$

In the lowlands, a proportion  $p_v$  of villages was selected for vaccination, and, within each of these villages, a proportion  $p_a$  of animals were immunised. We assessed the values of  $p_v$  and  $p_a$  required for the lowland village-level reproduction number to be below 1, i.e. PPRV could not then be sustained in the region. It was assessed by calculating the dominant eigenvalue of the next generation matrix (16):

$$\begin{pmatrix} r_{VV}^V & r_{VU}^V \\ r_{UV}^V & r_{UU}^V \end{pmatrix}$$

with the following four elements:

(1) the expected number of vaccinated villages infected by an infected vaccinated village:

$$r_{VV}^V = (p_v n_L - 1) \left( 1 - \int_{t=0}^{t=\infty} \exp \left[ -\beta_{LL}^b \frac{(1-p_a) N_L \sum_a I_{a,t}^V}{(n_L - 2) N_L + \sum_a N_{a,t}^V} \right] dt \right)$$

(2) the expected number of unvaccinated villages infected by an infected vaccinated village:

$$r_{VU}^V = (1 - p_v) n_L \left( 1 - \int_{t=0}^{t=\infty} \exp \left[ -\beta_{LL}^b \frac{N_L \sum_a I_{a,t}^V}{(n_L - 2) N_L + \sum_a N_{a,t}^V} \right] dt \right)$$

(3) the expected number of vaccinated villages infected by an infected unvaccinated village:

$$r_{UV}^V = p_v n_L \left( 1 - \int_{t=0}^{t=\infty} \exp \left[ -\beta_{LL}^b \frac{(1-p_a) N_L \sum_a I_{a,t}^U}{(n_L - 2) N_L + \sum_a N_{a,t}^U} \right] dt \right)$$

(4) the expected number of unvaccinated villages infected by an infected unvaccinated village:

$$r_{UU}^V = [(1 - p_v) n_L - 1] \left( 1 - \int_{t=0}^{t=\infty} \exp \left[ -\beta_{LL}^b \frac{N_L \sum_a I_{a,t}^U}{(n_L - 2) N_L + \sum_a N_{a,t}^U} \right] dt \right)$$

The superscripts  $U$  and  $V$  applied to  $N_{a,t}$  and  $I_{a,t}$  referred to the unvaccinated and vaccinated status of the primary infected village.

**Vaccination campaigns and temporal evolution of the immunity level.** The immunity level (i.e. proportion of immunised animals) in a village a year after the first round of vaccination, during which  $q_{y,r}$  young and  $q_{a,r}$  adult small ruminants were vaccinated, was given by:

$$V_1 = (1 - \kappa) q_{y,1} \sigma \varphi \frac{\int_{t=0}^{t=T-1} (1 - \gamma_{a=2})^t dt}{T} + \kappa q_{a,1} \sigma (1 - \gamma_{a=2})^T$$

With  $T=365$  days,  $\kappa$  the proportion of adults in the population,  $\sigma$  the vaccine effectiveness (i.e. proportion of vaccinated animals developing lifelong immunity),  $\gamma_{a=2}$  the non-PPR

mortality rate in adults, and  $\varphi$  the probability of a young animal becoming an adult.

Parameter values were the same as in the PPRV transmission model (Table S2), except that

$\gamma_{a=2}$  was expressed per day. The first part of the equation referred to the probability of a

young animal remaining in the population a year after the vaccination campaign.  $(1 - \kappa)q_{y,r}\sigma$

was the proportion of the population that was young and effectively immunised. As births

occurred all year long,  $1/T$  was the probability of a young animal to be born on any day in

the year preceding its vaccination.  $\int_{t=0}^{t=T-1} (1 - \gamma_{a=2})^t dt$  was the probability of an animal which

became an adult (with probability  $\varphi$ ) 365- $t$  days after having been vaccinated to still be in the

population  $t$  days later (i.e. 365 days after its vaccination). The second part of the equation

referred to the probability of immunised adults remaining in the population. In subsequent

rounds, only young animals were vaccinated, and the immunity level, a year after the round  $r$ ,

with  $r \geq 2$ , was expressed as:

$$V_{r \geq 2} = (1 - \kappa)q_{y,1}\sigma\varphi \frac{\int_{t=0}^{t=T-1} (1 - \gamma_{a=2})^t dt}{T} + V_{r-1} (1 - \gamma_{a=2})^T$$

## Parameters

**Prior distributions.** All prior distributions were uniform.  $\beta_L^w$  and  $\beta_H^w$  had the same prior

distribution. Attempts have been made to estimate the basic reproduction number within a flock

or a village.  $R_0$  was thus estimated as 2.8 in Senegal (17)<sup>1</sup> and around 4 in Tanzania (18). These

estimates should, however, be considered with caution. Final epidemic sizes were used to

estimate  $R_0$  in the Senegalese study. The population sizes were very small and estimates were

---

<sup>1</sup> Note that  $R_0$  was reported to be equal to 6.3. However, based on the reference provided in support of  $R_0$  calculation (36),  $f$  is the probability of surviving infection, and not the probability of dying of infection ( $f = 2/3$ ). Also, the authors did not account for the seronegative animals when estimating the population size, which should not have been equal to 148, but to 154. After correction,  $y = 6/154$  (the fraction that did not become infected) and  $x = 105/154$  (the fraction that survived the epidemic), verifying  $(1 - f)(1 - y) = (1 - x)$ .  $R_0 = (1 - f) \log(y) / \log(x) = 2.8$ .

thus highly influenced by uncertainty in the number of animals reported to have survived or died of the disease. In the Tanzanian study, the estimation of  $R_0$  was based on the age at sampling as a proxy for age of seroconversion.  $R_0$  for rinderpest virus was estimated at 1.2-1.9 and 4, for two different viral strains and settings in East Africa (19). While this information is not directly transferrable to our study, it seemed reasonable to constrain  $R_0^w$  to be less than 10. In the absence of any information about the transmission potential of PPRV between villages, wide distributions were chosen for  $\beta_{LL}^b$ ,  $\beta_{LH}^b$  and  $\beta_{HH}^b$ . The lower bounds of the prior distributions included 0, meaning that the corresponding inter-village reproduction numbers could be below 1. As mentioned in the Method section,  $r_{HL}$  was fixed to 0. Results with  $r_{HL} = 0.5$  are presented below.

**Fixed parameter values.** Parameter values are shown in Table S2. Based on the estimated lengths of incubation and symptomatic periods (17, 20), the average length of the infection period  $\tau$  – which was also the length of a timestep – was assumed to be equal to 10 days. The PPR case fatality rate  $\rho$  was the probability of an infected small ruminant dying of the disease.  $\rho$  is generally described to range from 20% to 80-90%, even approaching 100%, depending on the viral strain, the population at-risk, and the epidemic or endemic nature of the infection within the respective population (20-23). Field outbreak investigations conducted in affected sheep and goat flocks estimated variable case fatality rates: 18-27% in Iran (24), 25% in India (25), 40% in Egypt (26), 47% in Nigeria (27), 70% in Saudi Arabia (28). As a baseline,  $\rho$  was fixed to 50%, and the impact of variations in this parameter value on the estimation of other parameters was assessed (see below).

The parameters  $b_r, \delta, \gamma_{a=1}, \gamma_{a=2}$  were computed based on:

- The number of small ruminants per village,  $N_r$
- The proportion of adults in the population,  $\kappa$

- The probability of a young becoming an adult,  $\varphi$

In the absence of disease, the population dynamics in village  $i$  was given by:

$$N_{r,i,a=1,t} = b_{r,i,t} + (1-\delta)(1-\gamma_{a=1})N_{r,i,a=1,t-\tau}$$

$$N_{r,i,a=2,t} = (1-\gamma_{a=2})N_{r,i,a=2,t-\tau} + \delta(1-\gamma_{a=1})N_{r,i,a=1,t-\tau}$$

With  $N_{r,i,a=1,t}$  and  $N_{r,i,a=2,t}$  being the number of young and adult small ruminants at time  $t$ .

From time  $t$  to  $t+\tau$ , the rate at which small ruminants left the young compartment was

$\gamma_{a=1} + \delta(1-\gamma_{a=1})$ , the first element referring to young animals exiting the population (e.g.

harvested animals, animals dying from another disease) and the second to young animals

ageing (i.e. becoming adults). The probability of a young becoming adult,  $\varphi$ , was, therefore,

expressed as:

$$\varphi = \frac{\delta(1-\gamma_{a=1})}{\gamma_{a=1} + \delta(1-\gamma_{a=1})}$$

In order for the average time spent by animals in the young compartment to be one year, the

following constraint was applied:

$$\gamma_{a=1} + \delta(1-\gamma_{a=1}) = \tau/365$$

The parameters  $b_r, \delta, \gamma_{a=1}, \gamma_{a=2}$  could therefore be expressed as a function of  $N_r, \tau, p_A$ :

$$b_r = \frac{\tau}{365} \frac{(1-\kappa)}{\kappa} N_r$$

$$\delta = \frac{\tau\varphi}{365 - \tau(1-\varphi)}$$

$$\gamma_{a=1} = \frac{\tau(1-\varphi)}{365}$$

$$\gamma_{a=2} = \frac{\tau}{365} \frac{(1-\kappa)}{\kappa} \varphi$$

Domestic small ruminant populations are characterised by a low adult males:females (m:f) sex ratio (*ASR*) resulting from a sex-biased harvesting of young animals. The mortality rate of young animals differed between the sexes, while the mortality rate of adults was the same for males and females. The probability of a young becoming an adult was  $\varphi_M$  for males and  $\varphi_F$  for females. The adult m:f sex ratio could thus be expressed as:

$$ASR = \frac{\varphi_M}{\varphi_F}$$

With

$$\varphi = \frac{\varphi_M}{2} + \frac{\varphi_F}{2}$$

$\varphi_M$  and  $\varphi_F$  were given by:

$$\varphi_F = \frac{2\varphi}{(1 + ASR)}$$

$$\varphi_M = \frac{2\varphi ASR}{(1 + ASR)}$$

Based on the 2001-2002 agricultural census (1), the proportion of adults was  $\kappa=0.6$ , and the adult m:f sex ratio  $ASR=0.25$  (i.e. 80% of adults were female). This meant that the annual kidding rate  $k$ , i.e. the number of kids per adult female and per year (i.e.  $365(ASR+1)b_r/\tau$ ), was 0.83. While the average litter size for sheep and goats was reported to range between 1-1.5, the kidding interval was around 300 days and the survival rate of kids generally ranged between 0.5-0.9 (29-35). Annual kidding rates reported in the literature, therefore, ranged from 0.6 to 1.6. In order to explore the impact of an increase in the population turn-over on the estimation of infection parameters, we also considered  $\kappa=0.49$ , which corresponded to an annual kidding rate of 1.3.

The baseline probability of a young becoming an adult was  $\varphi = 0.5$ , which meant that 20% and 80% of young females and males were harvested before reaching one year of age (i.e.

$\varphi_F = 0.2$ ,  $\varphi_M = 0.8$ ). Another value  $\varphi = 0.625$  was also considered, implying  $\varphi_F = 1$  and  $\varphi_M = 0.25$ . The range of explored values of  $\kappa$  and  $\varphi$ , resulted in a turn-over rate of 40%-51% (proportion of the population being renewed within a year), and in an average life expectancy of 2.5-4 years for adults, depending on the parameter combination. The competitive ELISA test sensitivity and specificity were 0.945 and 0.994, respectively (37).

### Sensitivity analysis

**Prior distribution.** The marginal posterior distributions of  $\beta_L^w$  could be described as a combination of two probability density functions. A unimodal Gaussian-like distribution peaking for low  $\beta_L^w$  values, and a uniform distribution over high  $\beta_L^w$  values truncated by the upper bound of the prior distribution. For high values of  $\beta_L^w$ , the model was insensitive to further increases in the parameter value, as it did not affect village population infectiousness and simulated seroprevalence patterns (Figure S2). While  $\beta_L^w$  and  $\beta_{LL}^b$  were strongly negatively correlated for low values of  $\beta_L^w$ , this was not the case for high values of  $\beta_L^w$ : as  $\beta_L^w$  increased,  $\beta_{LL}^b$  remained constant (Figure S5).

As the upper bound of the prior distribution of  $\beta_L^w$  increased, the upper bound of its marginal posterior distribution also increased, resulting in higher  $\beta_L^w$  posterior median and credible intervals, and lower  $\beta_{LL}^b$  posterior median. However, the maximum a posteriori (MAPs) and the shape of the marginal posterior distributions of  $\beta_L^w$  and  $\beta_{LL}^b$  were unchanged. Likewise, the threshold for PPRV elimination remained the same.

**Number of villages and village population size.** Given the uncertainty about the number of villages within which lowland and highland small ruminant populations were divided, we

explored different scenarios, varying the overall number of villages and the ratio L:H between the number of villages in lowlands and highlands (Table S3). As the overall highland and lowland populations remained constant, changing the number of villages also altered village population sizes (Table S3). As the ratio L:H doubled,  $r_{LH}^b$  was divided by two. The upper bound of the credible interval of  $r_{HH}^b$  remained lower than 1, and the vaccination coverage required for PPRV elimination remained similar across scenarios, as immunising  $p_a \in [0.37, 0.39]$  animals in  $p_v \in [0.71, 0.73]$  villages would prevent viral circulation in the lowlands.

**PPR case fatality rate and demographic profiles.** To explore the impact of these parameters on the model outcome, the model was fitted to the serological results in lowlands only. The number  $n_L$  of lowland villages was fixed to 5000. Changes in the values of these parameters altered the posterior median estimates of  $\beta_L^w$  and  $\beta_{LL}^b$  (Table S4) in comparison to the baseline scenario (Table 1). However, the shapes of the marginal posterior distributions were unchanged: the highest posterior density of the level of within-village transmission in the lowlands was concentrated at low  $\beta_L^w$  values, and a second, low probability and almost uniform mode was located at high  $\beta_L^w$  values. The maximum a posteriori (MAP) was about the same as for the baseline scenario,  $\text{MAP} \in [1.33, 1.37]$ , only the relative densities of both posterior components were modified. The vaccination coverage required for PPRV elimination remained similar across scenarios, as immunising  $p_a \in [0.38, 0.41]$  animals in  $p_v \in [0.69, 0.73]$  villages would prevent viral circulation in lowlands.

**Relative strength of mixing between highlands and lowlands.** As mentioned in the main text,  $\beta_{HL}^b$  was expressed as  $\beta_{HL}^b = r_{HL} \beta_{LH}^b (P_H / P_L)$ , with  $r_{HL}$ , the relative strength of mixing. In the baseline scenario,  $r_{HL}$  was fixed to 0, i.e. highland animals could not infect lowland



animals. When fixing  $r_{HL}$  to 0.5 (with  $n_L = 10,000$  and  $n_H = 100,000$ ),  $r_{LL}^b$  decreased, from 1.49 (95%CrI:1.27-2.01) for  $r_{HL} = 0$ , to 1.38 (95%CrI:1.05-1.89). Due to the lower value of  $r_{LL}^b$ , the overall proportion of lowland small ruminants that would need to be immunised to prevent viral circulation was reduced by 10%, compared to a scenario for which  $r_{HL} = 0$ .

**Vaccine effectiveness.** Reducing vaccine effectiveness  $\sigma$  (i.e. the probability of a vaccinated animal to develop lifelong protective immunity) increased the number of small ruminants that would need to be vaccinated over the 4 rounds of vaccination by 11% for  $\sigma = 0.9$ , and 25% for  $\sigma = 0.8$  (Table S5).

**Intensity of the perturbation.** With  $\varphi = 0.2$ , the variance of the perturbation kernels was lower than the variance of the intermediate marginal posterior distributions (the ratio of the two variances  $\leq 0.8$ ). We re-estimated parameters by defining the value of  $\varphi$  for each ABC-SMC sequence and parameter in order to ensure that the variance of the perturbation kernel was always twice as high as the variance of the intermediate marginal posterior distribution (38). This resulted in a higher intensity of the perturbation,  $\varphi$  then ranging from 0.3 to 0.8 depending on the parameter and sequence, but it did not affect the parameter estimates (Table S8).

**Table S1: Serological survey results according to two partitioning criteria.** Afar and Somali: villages in Afar and Somali (or with an altitude lower than 1000m) are pastoral, others are sedentary;  $p_k$ : seroprevalence within a kebele; as the attribution of some samples to kebeles was simulated, the mean and the range of the proportion of kebeles with a given seroprevalence are shown.

|                           | Pastoral, lowlands  |                     | Sedentary, highlands     |                     |
|---------------------------|---------------------|---------------------|--------------------------|---------------------|
|                           | Afar, Somali        | <1000m              | Others than Afar, Somali | >1000m              |
| no. samples               | 2115                | 2548                | 11457                    | 11024               |
| no. positives (%)         | 352 (16.6%)         | 439 (17.2%)         | 522 (4.6%)               | 435 (3.9%)          |
| no. villages              | 120                 | 142                 | 582                      | 560                 |
| no. kebeles               | 79                  | 86                  | 268                      | 261                 |
| Prop. kebeles             |                     |                     |                          |                     |
| $0\% \leq p_k \leq 5\%$   | 25.3% (25.3%-25.3%) | 24.4% (24.4%-24.4%) | 72.1% (70.9%-73.5%)      | 73.6% (72.4%-74.7%) |
| $6\% \leq p_k \leq 10\%$  | 10.1% (10.1%-10.1%) | 10.5% (10.5%-10.5%) | 12.4% (10.4%-14.2%)      | 12.3% (10%-13.8%)   |
| $11\% \leq p_k \leq 20\%$ | 25.3% (25.3%-25.3%) | 25.6% (25.6%-25.6%) | 7.3% (6.3%-8.6%)         | 6.7% (5.7%-8%)      |
| $21\% \leq p_k \leq 30\%$ | 20.3% (20.3%-20.3%) | 19.8% (19.8%-19.8%) | 3.5% (3.4%-3.7%)         | 3.2% (3.1%-3.4%)    |
| $31\% \leq p_k \leq 40\%$ | 8.9% (8.9%-8.9%)    | 9.3% (9.3%-9.3%)    | 0.4% (0.4%-0.4%)         | 0% (0%-0%)          |
| $41\% \leq p_k \leq 50\%$ | 2.5% (2.5%-2.5%)    | 3.5% (3.5%-3.5%)    | 2.6% (2.6%-2.6%)         | 2.3% (2.3%-2.3%)    |
| $p_k \geq 51\%$           | 7.6% (7.6%-7.6%)    | 7% (7%-7%)          | 1.9% (1.9%-1.9%)         | 1.9% (1.9%-1.9%)    |

**Table S2: Parameter values.**  $\gamma_{a=1}$ ,  $\gamma_{a=2}$ ,  $\delta$ ,  $k$  and  $l$  were computed based on values of  $\tau$ ,  $\kappa$  and  $\varphi$ . References and justification of parameter values are provided in the supplementary text; the turn-over rate refers to the proportion of the population which is renewed in a year.

| Parameters             | Description (unit)                          | Values   |                  |      |       |      |      |
|------------------------|---------------------------------------------|----------|------------------|------|-------|------|------|
|                        |                                             | Baseline | <i>Scenarios</i> |      |       |      |      |
| Infection parameters   |                                             |          |                  |      |       |      |      |
| $\tau$                 | Infection period (days)                     | 10       |                  |      |       |      |      |
| $\rho$                 | PPR case fatality rate                      | 0.5      | 0.5              | 0.5  | 0.5   | 0.2  | 0.8  |
| Demographic parameters |                                             |          |                  |      |       |      |      |
| $\kappa$               | Proportion of adults                        | 0.6      | 0.6              | 0.49 | 0.49  | 0.6  | 0.6  |
| $\varphi$              | probability of a young becoming adult       | 0.5      | 0.625            | 0.5  | 0.625 | 0.5  | 0.5  |
| $\gamma_{a=1}$         | Mortality rate, young ( $\times 10^{-2}$ )  | 1.37     | 1.03             | 1.37 | 1.03  | 1.37 | 1.37 |
| $\gamma_{a=2}$         | Mortality rate, adults ( $\times 10^{-2}$ ) | 0.91     | 1.14             | 1.43 | 1.78  | 0.91 | 0.91 |
| $\delta$               | Ageing parameter ( $\times 10^{-2}$ )       | 1.39     | 1.73             | 1.39 | 1.73  | 1.39 | 1.39 |
| $k$                    | Annual kidding rate                         | 0.83     | 0.83             | 1.30 | 1.30  | 0.83 | 0.83 |
| $l$                    | Life expectancy of adults (years)           | 4        | 3.4              | 2.9  | 2.5   | 4    | 4    |
|                        | Turn-over rate                              | 40%      | 40%              | 51%  | 51%   | 40%  | 40%  |

**Table S3: Impact of variations in the number of villages on parameter posterior estimates and reproduction number posterior predictive values.**  $n_L$  and  $n_H$  refer to the number of villages in the lowlands and highlands; the human rural populations in the lowlands and highlands were estimated to 4.12 and 47.37 million, and the small ruminant population sizes to 17.4 and 27.2 million in both regions; posterior median and 95% credible intervals are shown; posterior predictive values of animal- and village-level reproduction numbers were calculated based on the inferred posterior distribution.

|                                     | Number of villages |                  |                  |                  |
|-------------------------------------|--------------------|------------------|------------------|------------------|
| $n_L$                               | 5000               | 5000             | 10,000           | 10,000           |
| $n_H$                               | 25,000             | 50,000           | 50,000           | 100,000          |
| $n_L : n_H$                         | 1:5                | 1:10             | 1:5              | 1:10             |
| Number of people/village            |                    |                  |                  |                  |
| Lowland                             | 824                | 824              | 412              | 412              |
| Highland                            | 1895               | 947              | 947              | 474              |
| Number of small ruminants/village   |                    |                  |                  |                  |
| Lowland                             | 3473               | 3473             | 1736             | 1736             |
| Highland                            | 1087               | 543              | 543              | 272              |
| $\beta_L^w$                         | 1.54 (1.28-9.32)   | 1.53 (1.27-9.34) | 1.55 (1.28-9.27) | 1.56 (1.26-9.45) |
| $\beta_H^w$                         | 5.70 (1.88-9.70)   | 5.91 (1.85-9.87) | 6.01 (1.92-9.78) | 6.19 (1.85-9.73) |
| $\beta_{LL}^b$ ( $\times 10^{-3}$ ) | 0.54 (0.37-0.97)   | 0.54 (0.37-0.97) | 1.07 (0.74-1.94) | 1.08 (0.75-1.94) |
| $\beta_{LH}^b$ ( $\times 10^{-3}$ ) | 0.13 (0.03-0.27)   | 0.26 (0.07-0.51) | 0.25 (0.05-0.49) | 0.50 (0.08-1.05) |
| $\beta_{HH}^b$ ( $\times 10^{-3}$ ) | 0.28 (0.01-0.84)   | 0.57 (0.03-1.61) | 0.58 (0.03-1.73) | 1.19 (0.06-3.47) |
| $R_{0,L}^w$                         | 1.52 (1.26-9.22)   | 1.51 (1.26-9.23) | 1.53 (1.26-9.17) | 1.54 (1.24-9.35) |
| $R_{0,H}^w$                         | 5.63 (1.86-9.60)   | 5.84 (1.83-9.76) | 5.94 (1.90-9.68) | 6.11 (1.83-9.63) |
| $r_{LL}^b$                          | 1.51 (1.25-2.03)   | 1.50 (1.27-2.03) | 1.49 (1.27-2.01) | 1.49 (1.27-2.01) |
| $r_{LH}^b$                          | 0.57 (0.14-1.25)   | 1.13 (0.27-2.46) | 0.55 (0.12-1.12) | 1.09 (0.20-2.36) |
| $r_{HH}^b$                          | 0.30 (0.01-0.88)   | 0.31 (0.01-0.86) | 0.31 (0.02-0.92) | 0.32 (0.01-0.91) |

**Table S4: Impact of variations in the case fatality rate on parameter posterior estimates and reproduction number posterior predictive values.** Only lowland transmission parameters were estimated, using 5000 villages; posterior median and 95% credible intervals are shown; posterior predictive values of animal- and village-level reproduction numbers were calculated based on the inferred posterior distribution;  $\rho$ : PPR case fatality rate;  $\kappa$ : proportion of adults;  $\varphi$ : probability of a young becoming adult.

| PPR case fatality rate and demographic parameters |             |             |             |             |             |             |
|---------------------------------------------------|-------------|-------------|-------------|-------------|-------------|-------------|
| $\rho$                                            | 0.5         | 0.2         | 0.8         | 0.5         | 0.5         | 0.5         |
| $\kappa$                                          | 0.6         | 0.6         | 0.6         | 0.6         | 0.49        | 0.49        |
| $\varphi$                                         | 0.5         | 0.5         | 0.5         | 0.625       | 0.5         | 0.625       |
| $\beta_L^w$                                       | 1.88        | 1.53        | 3.33        | 1.85        | 1.40        | 1.40        |
|                                                   | (1.28-9.76) | (1.28-9.74) | (1.26-9.58) | (1.28-9.79) | (1.24-9.21) | (1.26-9.17) |
| $\beta_{LL}^b$                                    | 0.47        | 0.64        | 0.44        | 0.47        | 0.64        | 0.67        |
| ( $\times 10^{-3}$ )                              | (0.37-0.94) | (0.38-1.18) | (0.36-0.80) | (0.36-0.96) | (0.36-1.11) | (0.37-1.08) |
| $R_{0,L}^w$                                       | 1.86        | 1.51        | 3.30        | 1.83        | 1.38        | 1.38        |
|                                                   | (1.26-9.65) | (1.26-9.63) | (1.25-9.47) | (1.26-9.68) | (1.23-9.10) | (1.25-9.07) |
| $r_{LL}^b$                                        | 1.48        | 1.52        | 1.51        | 1.48        | 1.58        | 1.64        |
|                                                   | (1.26-2.00) | (1.31-1.97) | (1.24-2.24) | (1.26-2.10) | (1.26-2.32) | (1.28-2.26) |

**Table S5: Within-village vaccination coverage and number of vaccine doses required to eliminate PPRV from the lowlands.** The number of animals to be vaccinated within a village and within the entire lowland region was computed to ensure that 37% animals were immunised a year after a vaccination round, in 70.7% villages.  $\sigma$ : vaccine effectiveness;  $v$ : within-village vaccination coverage; doses: overall number of vaccine doses for the lowlands;  $P_c$ : ratio between the number of vaccinated animals suggested here and assuming a full vaccination coverage (round 1: all young and adult animals, round 2-4: all young animals).

|                           | Turn-over: 40% |                |                | Turn-over: 51% |                |                |
|---------------------------|----------------|----------------|----------------|----------------|----------------|----------------|
|                           | $\sigma = 1$   | $\sigma = 0.9$ | $\sigma = 0.8$ | $\sigma = 1$   | $\sigma = 0.9$ | $\sigma = 0.8$ |
| <b>Round 1</b>            |                |                |                |                |                |                |
| v, young                  | 61.7%          | 68.5%          | 77.1%          | 75.5%          | 83.9%          | 94.4%          |
| v, adults                 | 61.7%          | 68.5%          | 77.1%          | 75.5%          | 83.9%          | 94.4%          |
| v, all                    | 61.7%          | 68.5%          | 77.1%          | 75.5%          | 83.9%          | 94.4%          |
| Doses (x10 <sup>6</sup> ) | 7.6            | 8.4            | 9.5            | 9.3            | 10.3           | 11.6           |
| <b>Round 2</b>            |                |                |                |                |                |                |
| v, young                  | 61.6%          | 68.6%          | 77.0%          | 75.5%          | 83.9%          | 94.4%          |
| v, adults                 | 0%             | 0%             | 0%             | 0%             | 0%             | 0%             |
| v, all                    | 24.6%          | 27.4%          | 30.8%          | 38.5%          | 42.8%          | 48.1%          |
| Doses (x10 <sup>6</sup> ) | 3.0            | 3.4            | 3.8            | 4.7            | 5.3            | 5.9            |
| <b>Round 3</b>            |                |                |                |                |                |                |
| v, young                  | 61.7%          | 68.5%          | 77.1%          | 75.5%          | 83.9%          | 94.4%          |
| v, adults                 | 0%             | 0%             | 0%             | 0%             | 0%             | 0%             |
| v, all                    | 24.7%          | 27.4%          | 30.8%          | 38.5%          | 42.8%          | 48.1%          |
| Doses (x10 <sup>6</sup> ) | 3.0            | 3.4            | 3.8            | 4.7            | 5.3            | 5.9            |
| <b>Round 4</b>            |                |                |                |                |                |                |
| v, young                  | 61.6%          | 68.5%          | 77.1%          | 75.5%          | 83.9%          | 94.4%          |
| v, adults                 | 0%             | 0%             | 0%             | 0%             | 0%             | 0%             |
| v, all                    | 24.6%          | 27.4%          | 30.8%          | 38.5%          | 42.8%          | 48.1%          |
| Doses (x10 <sup>6</sup> ) | 3.0            | 3.4            | 3.8            | 4.7            | 5.3            | 5.9            |
| <b>All rounds</b>         |                |                |                |                |                |                |
| Doses (x10 <sup>6</sup> ) | 16.6           | 18.5           | 20.8           | 23.5           | 26.1           | 29.3           |
| $P_c$                     | 43.6%          | 48.4%          | 54.5%          | 53.4%          | 59.3%          | 66.7%          |

**Table S6: Sample sizes in lowland villages.** Each row refers to a surveyed village, *n*: the number of animals sampled in each village, ID: the ID of the corresponding kebele.

|     | <i>n</i> | ID |      | <i>n</i> | ID |
|-----|----------|----|------|----------|----|
| v1  | 20       | 1  | v61  | 20       | 38 |
| v2  | 20       | 1  | v62  | 20       | 38 |
| v3  | 20       | 2  | v63  | 20       | 39 |
| v4  | 20       | 2  | v64  | 20       | 40 |
| v5  | 20       | 3  | v65  | 20       | 40 |
| v6  | 20       | 3  | v66  | 20       | 41 |
| v7  | 20       | 4  | v67  | 20       | 42 |
| v8  | 20       | 4  | v68  | 7        | 42 |
| v9  | 20       | 5  | v69  | 10       | 43 |
| v10 | 20       | 5  | v70  | 18       | 44 |
| v11 | 20       | 6  | v71  | 18       | 45 |
| v12 | 20       | 6  | v72  | 18       | 46 |
| v13 | 20       | 7  | v73  | 13       | 47 |
| v14 | 20       | 7  | v74  | 6        | 48 |
| v15 | 20       | 8  | v75  | 10       | 49 |
| v16 | 20       | 8  | v76  | 7        | 50 |
| v17 | 20       | 9  | v77  | 12       | 51 |
| v18 | 20       | 9  | v78  | 9        | 52 |
| v19 | 20       | 10 | v79  | 8        | 53 |
| v20 | 20       | 10 | v80  | 10       | 54 |
| v21 | 11       | 11 | v81  | 11       | 55 |
| v22 | 20       | 12 | v82  | 7        | 56 |
| v23 | 20       | 12 | v83  | 20       | 57 |
| v24 | 20       | 13 | v84  | 20       | 57 |
| v25 | 20       | 13 | v85  | 20       | 58 |
| v26 | 20       | 14 | v86  | 20       | 58 |
| v27 | 20       | 14 | v87  | 20       | 59 |
| v28 | 20       | 15 | v88  | 20       | 59 |
| v29 | 18       | 15 | v89  | 20       | 60 |
| v30 | 20       | 16 | v90  | 20       | 60 |
| v31 | 20       | 16 | v91  | 20       | 61 |
| v32 | 20       | 17 | v92  | 20       | 61 |
| v33 | 4        | 17 | v93  | 18       | 62 |
| v34 | 20       | 18 | v94  | 20       | 63 |
| v35 | 16       | 18 | v95  | 20       | 63 |
| v36 | 20       | 19 | v96  | 20       | 64 |
| v37 | 20       | 19 | v97  | 20       | 64 |
| v38 | 20       | 20 | v98  | 20       | 65 |
| v39 | 20       | 21 | v99  | 20       | 65 |
| v40 | 20       | 21 | v100 | 20       | 66 |
| v41 | 20       | 22 | v101 | 20       | 66 |
| v42 | 20       | 23 | v102 | 10       | 67 |
| v43 | 20       | 23 | v103 | 20       | 68 |
| v44 | 9        | 24 | v104 | 20       | 69 |
| v45 | 17       | 25 | v105 | 20       | 69 |
| v46 | 20       | 26 | v106 | 15       | 70 |
| v47 | 4        | 26 | v107 | 20       | 71 |
| v48 | 12       | 27 | v108 | 20       | 72 |
| v49 | 18       | 28 | v109 | 20       | 73 |
| v50 | 20       | 29 | v110 | 20       | 74 |
| v51 | 4        | 29 | v111 | 20       | 74 |
| v52 | 10       | 30 | v112 | 20       | 75 |
| v53 | 14       | 31 | v113 | 20       | 75 |
| v54 | 10       | 32 | v114 | 20       | 76 |
| v55 | 20       | 33 | v115 | 20       | 76 |
| v56 | 2        | 33 | v116 | 20       | 77 |
| v57 | 20       | 34 | v117 | 20       | 77 |
| v58 | 20       | 35 | v118 | 20       | 78 |
| v59 | 20       | 36 | v119 | 20       | 78 |
| v60 | 20       | 37 | v120 | 19       | 79 |

**Table S7: Sample sizes in highland villages.** Each row refers to a surveyed village,  $n$ : the number of animals sampled in each village, ID: the ID of the corresponding kebele.

|     | $n$ | ID |      | $n$ | ID |      | $n$ | ID  |      | $n$ | ID  |      | $n$ | ID  |
|-----|-----|----|------|-----|----|------|-----|-----|------|-----|-----|------|-----|-----|
| v1  | 20  | 1  | v71  | 20  | 41 | v141 | 20  | 76  | v211 | 20  | 110 | v281 | 20  | 144 |
| v2  | 13  | 1  | v72  | 20  | 42 | v142 | 20  | 77  | v212 | 20  | 110 | v282 | 20  | 144 |
| v3  | 20  | 2  | v73  | 20  | 42 | v143 | 20  | 77  | v213 | 20  | 111 | v283 | 20  | 144 |
| v4  | 13  | 2  | v74  | 20  | 42 | v144 | 20  | 78  | v214 | 20  | 111 | v284 | 20  | 144 |
| v5  | 20  | 3  | v75  | 20  | 42 | v145 | 20  | 78  | v215 | 20  | 112 | v285 | 20  | 145 |
| v6  | 11  | 3  | v76  | 20  | 43 | v146 | 20  | 79  | v216 | 20  | 112 | v286 | 20  | 145 |
| v7  | 20  | 4  | v77  | 20  | 43 | v147 | 20  | 79  | v217 | 20  | 113 | v287 | 20  | 146 |
| v8  | 13  | 4  | v78  | 20  | 43 | v148 | 20  | 80  | v218 | 20  | 113 | v288 | 20  | 147 |
| v9  | 20  | 5  | v79  | 20  | 44 | v149 | 20  | 80  | v219 | 20  | 114 | v289 | 20  | 147 |
| v10 | 12  | 5  | v80  | 20  | 44 | v150 | 20  | 81  | v220 | 20  | 114 | v290 | 20  | 148 |
| v11 | 20  | 6  | v81  | 20  | 44 | v151 | 20  | 81  | v221 | 20  | 115 | v291 | 20  | 148 |
| v12 | 20  | 7  | v82  | 19  | 44 | v152 | 20  | 82  | v222 | 20  | 115 | v292 | 20  | 149 |
| v13 | 20  | 8  | v83  | 20  | 45 | v153 | 20  | 82  | v223 | 20  | 116 | v293 | 20  | 149 |
| v14 | 20  | 9  | v84  | 20  | 45 | v154 | 20  | 83  | v224 | 20  | 116 | v294 | 20  | 150 |
| v15 | 20  | 10 | v85  | 2   | 45 | v155 | 20  | 83  | v225 | 20  | 117 | v295 | 20  | 150 |
| v16 | 20  | 11 | v86  | 20  | 46 | v156 | 20  | 84  | v226 | 20  | 117 | v296 | 20  | 150 |
| v17 | 20  | 12 | v87  | 20  | 47 | v157 | 20  | 84  | v227 | 20  | 118 | v297 | 20  | 150 |
| v18 | 20  | 13 | v88  | 20  | 48 | v158 | 20  | 85  | v228 | 20  | 118 | v298 | 20  | 151 |
| v19 | 20  | 14 | v89  | 20  | 49 | v159 | 20  | 85  | v229 | 20  | 119 | v299 | 20  | 151 |
| v20 | 20  | 15 | v90  | 20  | 50 | v160 | 20  | 86  | v230 | 20  | 119 | v300 | 20  | 151 |
| v21 | 20  | 16 | v91  | 20  | 51 | v161 | 20  | 86  | v231 | 20  | 120 | v301 | 20  | 151 |
| v22 | 20  | 16 | v92  | 20  | 51 | v162 | 20  | 87  | v232 | 20  | 120 | v302 | 20  | 152 |
| v23 | 20  | 17 | v93  | 20  | 52 | v163 | 20  | 87  | v233 | 20  | 121 | v303 | 20  | 152 |
| v24 | 18  | 17 | v94  | 12  | 52 | v164 | 20  | 88  | v234 | 20  | 121 | v304 | 20  | 152 |
| v25 | 20  | 18 | v95  | 20  | 53 | v165 | 20  | 88  | v235 | 20  | 122 | v305 | 20  | 152 |
| v26 | 20  | 19 | v96  | 20  | 53 | v166 | 20  | 89  | v236 | 20  | 122 | v306 | 20  | 153 |
| v27 | 20  | 20 | v97  | 20  | 54 | v167 | 20  | 89  | v237 | 20  | 123 | v307 | 20  | 153 |
| v28 | 20  | 21 | v98  | 20  | 54 | v168 | 20  | 90  | v238 | 20  | 123 | v308 | 20  | 153 |
| v29 | 20  | 22 | v99  | 20  | 55 | v169 | 20  | 90  | v239 | 20  | 124 | v309 | 20  | 153 |
| v30 | 20  | 23 | v100 | 20  | 55 | v170 | 20  | 91  | v240 | 20  | 124 | v310 | 20  | 154 |
| v31 | 20  | 23 | v101 | 20  | 56 | v171 | 20  | 91  | v241 | 20  | 125 | v311 | 20  | 154 |
| v32 | 20  | 24 | v102 | 20  | 56 | v172 | 20  | 92  | v242 | 20  | 126 | v312 | 20  | 154 |
| v33 | 20  | 24 | v103 | 20  | 57 | v173 | 20  | 92  | v243 | 20  | 127 | v313 | 20  | 154 |
| v34 | 20  | 25 | v104 | 20  | 57 | v174 | 20  | 93  | v244 | 20  | 127 | v314 | 20  | 155 |
| v35 | 20  | 25 | v105 | 20  | 58 | v175 | 20  | 93  | v245 | 20  | 128 | v315 | 20  | 155 |
| v36 | 20  | 26 | v106 | 20  | 58 | v176 | 20  | 94  | v246 | 20  | 129 | v316 | 20  | 155 |
| v37 | 20  | 26 | v107 | 20  | 59 | v177 | 20  | 94  | v247 | 20  | 129 | v317 | 20  | 155 |
| v38 | 20  | 27 | v108 | 5   | 59 | v178 | 20  | 95  | v248 | 20  | 130 | v318 | 20  | 156 |
| v39 | 20  | 27 | v109 | 20  | 60 | v179 | 20  | 95  | v249 | 20  | 130 | v319 | 20  | 156 |
| v40 | 20  | 27 | v110 | 20  | 60 | v180 | 20  | 95  | v250 | 20  | 130 | v320 | 20  | 157 |
| v41 | 20  | 27 | v111 | 20  | 61 | v181 | 20  | 95  | v251 | 20  | 130 | v321 | 20  | 157 |
| v42 | 20  | 28 | v112 | 20  | 61 | v182 | 20  | 95  | v252 | 20  | 131 | v322 | 20  | 158 |
| v43 | 20  | 28 | v113 | 20  | 62 | v183 | 20  | 95  | v253 | 20  | 131 | v323 | 20  | 158 |
| v44 | 20  | 28 | v114 | 20  | 62 | v184 | 20  | 96  | v254 | 20  | 132 | v324 | 20  | 159 |
| v45 | 20  | 28 | v115 | 20  | 63 | v185 | 20  | 96  | v255 | 20  | 132 | v325 | 20  | 159 |
| v46 | 20  | 29 | v116 | 20  | 63 | v186 | 19  | 97  | v256 | 20  | 132 | v326 | 20  | 160 |
| v47 | 20  | 29 | v117 | 20  | 64 | v187 | 20  | 98  | v257 | 20  | 132 | v327 | 20  | 160 |
| v48 | 20  | 30 | v118 | 20  | 64 | v188 | 20  | 98  | v258 | 20  | 133 | v328 | 20  | 161 |
| v49 | 20  | 30 | v119 | 20  | 65 | v189 | 20  | 99  | v259 | 20  | 133 | v329 | 20  | 161 |
| v50 | 20  | 31 | v120 | 20  | 65 | v190 | 20  | 99  | v260 | 20  | 134 | v330 | 20  | 162 |
| v51 | 20  | 31 | v121 | 20  | 66 | v191 | 20  | 100 | v261 | 20  | 134 | v331 | 20  | 162 |
| v52 | 19  | 32 | v122 | 20  | 67 | v192 | 11  | 100 | v262 | 20  | 135 | v332 | 20  | 163 |
| v53 | 20  | 33 | v123 | 20  | 67 | v193 | 20  | 101 | v263 | 20  | 135 | v333 | 20  | 163 |
| v54 | 11  | 33 | v124 | 20  | 68 | v194 | 20  | 101 | v264 | 20  | 136 | v334 | 20  | 164 |
| v55 | 20  | 34 | v125 | 14  | 68 | v195 | 20  | 102 | v265 | 20  | 136 | v335 | 2   | 164 |
| v56 | 20  | 34 | v126 | 20  | 69 | v196 | 20  | 102 | v266 | 20  | 136 | v336 | 20  | 165 |
| v57 | 20  | 35 | v127 | 19  | 69 | v197 | 20  | 103 | v267 | 20  | 136 | v337 | 20  | 165 |
| v58 | 20  | 35 | v128 | 20  | 70 | v198 | 20  | 103 | v268 | 20  | 137 | v338 | 20  | 166 |
| v59 | 20  | 36 | v129 | 20  | 70 | v199 | 20  | 104 | v269 | 20  | 137 | v339 | 20  | 166 |
| v60 | 20  | 36 | v130 | 20  | 71 | v200 | 20  | 104 | v270 | 20  | 138 | v340 | 20  | 167 |
| v61 | 20  | 37 | v131 | 19  | 71 | v201 | 20  | 105 | v271 | 20  | 138 | v341 | 20  | 168 |
| v62 | 20  | 37 | v132 | 20  | 72 | v202 | 20  | 105 | v272 | 20  | 139 | v342 | 20  | 169 |
| v63 | 20  | 38 | v133 | 17  | 72 | v203 | 20  | 106 | v273 | 20  | 139 | v343 | 20  | 169 |
| v64 | 20  | 38 | v134 | 20  | 73 | v204 | 20  | 106 | v274 | 20  | 140 | v344 | 20  | 170 |
| v65 | 20  | 39 | v135 | 10  | 73 | v205 | 20  | 107 | v275 | 20  | 140 | v345 | 20  | 170 |
| v66 | 20  | 39 | v136 | 20  | 74 | v206 | 20  | 107 | v276 | 20  | 141 | v346 | 20  | 171 |
| v67 | 20  | 40 | v137 | 13  | 74 | v207 | 20  | 108 | v277 | 20  | 141 | v347 | 20  | 171 |
| v68 | 20  | 40 | v138 | 20  | 75 | v208 | 20  | 108 | v278 | 20  | 142 | v348 | 20  | 172 |
| v69 | 18  | 40 | v139 | 20  | 75 | v209 | 20  | 109 | v279 | 20  | 142 | v349 | 20  | 172 |
| v70 | 20  | 41 | v140 | 20  | 76 | v210 | 20  | 109 | v280 | 20  | 143 | v350 | 20  | 173 |



| <i>n</i> | ID | <i>n</i> | ID   | <i>n</i> | ID  | <i>n</i> | ID |     |      |    |     |
|----------|----|----------|------|----------|-----|----------|----|-----|------|----|-----|
| v351     | 20 | 173      | v421 | 20       | 202 | v491     | 20 | 226 | v561 | 20 | 257 |
| v352     | 20 | 173      | v422 | 20       | 202 | v492     | 20 | 226 | v562 | 20 | 257 |
| v353     | 20 | 173      | v423 | 20       | 202 | v493     | 20 | 226 | v563 | 20 | 257 |
| v354     | 20 | 173      | v424 | 20       | 203 | v494     | 20 | 227 | v564 | 20 | 257 |
| v355     | 20 | 174      | v425 | 20       | 203 | v495     | 20 | 227 | v565 | 20 | 258 |
| v356     | 20 | 174      | v426 | 20       | 203 | v496     | 20 | 227 | v566 | 20 | 259 |
| v357     | 20 | 174      | v427 | 20       | 203 | v497     | 20 | 227 | v567 | 20 | 260 |
| v358     | 20 | 174      | v428 | 20       | 204 | v498     | 20 | 227 | v568 | 20 | 261 |
| v359     | 20 | 174      | v429 | 20       | 204 | v499     | 20 | 228 | v569 | 20 | 262 |
| v360     | 20 | 175      | v430 | 20       | 204 | v500     | 20 | 228 | v570 | 20 | 263 |
| v361     | 20 | 175      | v431 | 20       | 204 | v501     | 20 | 229 | v571 | 20 | 263 |
| v362     | 20 | 175      | v432 | 20       | 205 | v502     | 20 | 229 | v572 | 20 | 264 |
| v363     | 20 | 175      | v433 | 20       | 205 | v503     | 20 | 230 | v573 | 20 | 264 |
| v364     | 20 | 175      | v434 | 20       | 205 | v504     | 20 | 230 | v574 | 20 | 265 |
| v365     | 20 | 176      | v435 | 20       | 205 | v505     | 20 | 231 | v575 | 20 | 266 |
| v366     | 20 | 176      | v436 | 20       | 206 | v506     | 20 | 231 | v576 | 20 | 266 |
| v367     | 20 | 176      | v437 | 20       | 206 | v507     | 20 | 232 | v577 | 20 | 266 |
| v368     | 20 | 177      | v438 | 20       | 206 | v508     | 20 | 232 | v578 | 20 | 266 |
| v369     | 20 | 178      | v439 | 20       | 206 | v509     | 20 | 233 | v579 | 20 | 267 |
| v370     | 20 | 178      | v440 | 20       | 207 | v510     | 20 | 233 | v580 | 20 | 267 |
| v371     | 20 | 178      | v441 | 20       | 207 | v511     | 20 | 234 | v581 | 20 | 268 |
| v372     | 20 | 178      | v442 | 20       | 208 | v512     | 20 | 234 | v582 | 20 | 268 |
| v373     | 20 | 178      | v443 | 20       | 208 | v513     | 20 | 235 |      |    |     |
| v374     | 20 | 179      | v444 | 20       | 209 | v514     | 20 | 235 |      |    |     |
| v375     | 20 | 179      | v445 | 20       | 209 | v515     | 20 | 236 |      |    |     |
| v376     | 20 | 180      | v446 | 20       | 209 | v516     | 20 | 236 |      |    |     |
| v377     | 20 | 181      | v447 | 20       | 209 | v517     | 20 | 237 |      |    |     |
| v378     | 20 | 182      | v448 | 20       | 210 | v518     | 20 | 237 |      |    |     |
| v379     | 20 | 182      | v449 | 20       | 210 | v519     | 20 | 238 |      |    |     |
| v380     | 20 | 183      | v450 | 20       | 211 | v520     | 20 | 238 |      |    |     |
| v381     | 20 | 183      | v451 | 20       | 211 | v521     | 20 | 239 |      |    |     |
| v382     | 20 | 184      | v452 | 20       | 212 | v522     | 20 | 239 |      |    |     |
| v383     | 20 | 185      | v453 | 20       | 212 | v523     | 20 | 240 |      |    |     |
| v384     | 20 | 186      | v454 | 20       | 213 | v524     | 20 | 240 |      |    |     |
| v385     | 20 | 187      | v455 | 20       | 213 | v525     | 20 | 241 |      |    |     |
| v386     | 20 | 188      | v456 | 20       | 214 | v526     | 20 | 241 |      |    |     |
| v387     | 20 | 189      | v457 | 20       | 214 | v527     | 20 | 242 |      |    |     |
| v388     | 20 | 189      | v458 | 20       | 215 | v528     | 20 | 242 |      |    |     |
| v389     | 20 | 190      | v459 | 20       | 215 | v529     | 20 | 243 |      |    |     |
| v390     | 20 | 190      | v460 | 20       | 216 | v530     | 20 | 243 |      |    |     |
| v391     | 20 | 191      | v461 | 20       | 216 | v531     | 20 | 244 |      |    |     |
| v392     | 20 | 191      | v462 | 20       | 217 | v532     | 20 | 244 |      |    |     |
| v393     | 20 | 192      | v463 | 20       | 217 | v533     | 20 | 245 |      |    |     |
| v394     | 20 | 192      | v464 | 20       | 218 | v534     | 20 | 246 |      |    |     |
| v395     | 20 | 193      | v465 | 20       | 218 | v535     | 13 | 246 |      |    |     |
| v396     | 20 | 193      | v466 | 20       | 219 | v536     | 20 | 247 |      |    |     |
| v397     | 20 | 194      | v467 | 20       | 219 | v537     | 20 | 248 |      |    |     |
| v398     | 20 | 194      | v468 | 20       | 220 | v538     | 20 | 249 |      |    |     |
| v399     | 20 | 195      | v469 | 20       | 220 | v539     | 20 | 250 |      |    |     |
| v400     | 20 | 195      | v470 | 20       | 221 | v540     | 20 | 251 |      |    |     |
| v401     | 20 | 196      | v471 | 20       | 221 | v541     | 18 | 252 |      |    |     |
| v402     | 20 | 196      | v472 | 20       | 222 | v542     | 20 | 253 |      |    |     |
| v403     | 20 | 197      | v473 | 20       | 222 | v543     | 5  | 253 |      |    |     |
| v404     | 20 | 198      | v474 | 20       | 223 | v544     | 20 | 254 |      |    |     |
| v405     | 20 | 198      | v475 | 20       | 223 | v545     | 20 | 255 |      |    |     |
| v406     | 20 | 198      | v476 | 20       | 223 | v546     | 11 | 255 |      |    |     |
| v407     | 20 | 198      | v477 | 20       | 223 | v547     | 20 | 256 |      |    |     |
| v408     | 20 | 199      | v478 | 20       | 223 | v548     | 20 | 256 |      |    |     |
| v409     | 20 | 199      | v479 | 20       | 224 | v549     | 20 | 256 |      |    |     |
| v410     | 20 | 199      | v480 | 20       | 224 | v550     | 20 | 256 |      |    |     |
| v411     | 20 | 199      | v481 | 20       | 224 | v551     | 20 | 256 |      |    |     |
| v412     | 20 | 200      | v482 | 20       | 224 | v552     | 20 | 256 |      |    |     |
| v413     | 20 | 200      | v483 | 20       | 224 | v553     | 20 | 257 |      |    |     |
| v414     | 20 | 200      | v484 | 20       | 225 | v554     | 20 | 257 |      |    |     |
| v415     | 20 | 200      | v485 | 20       | 225 | v555     | 20 | 257 |      |    |     |
| v416     | 20 | 201      | v486 | 20       | 225 | v556     | 20 | 257 |      |    |     |
| v417     | 20 | 201      | v487 | 20       | 225 | v557     | 20 | 257 |      |    |     |
| v418     | 20 | 201      | v488 | 20       | 225 | v558     | 20 | 257 |      |    |     |
| v419     | 20 | 201      | v489 | 20       | 226 | v559     | 20 | 257 |      |    |     |
| v420     | 20 | 202      | v490 | 20       | 226 | v560     | 20 | 257 |      |    |     |

**Table S8: Parameter posterior estimates and posterior predictive values of reproduction numbers with a fixed or a flexible intensity of the perturbation kernel.** When fixed, the intensity  $\varphi$  of the perturbation was 0.2 (results presented in Table 1). When flexible,  $\varphi$  was defined for each parameter and ABC-SMC sequence in order to ensure that the variance of the perturbation kernel was always twice as high as the variance of the intermediate marginal posterior distribution;  $\beta$ : the number of effective contacts per animal over a 10 day-period – the length of the infection period;  $\beta_r^w$  refers to PPRV transmission within a village in region  $r$ , and  $\beta_{kr}^b$  to inter-village transmission from region  $k$  to  $r$ ; likewise,  $R_{0,r}^w$  is the within-village reproduction number in region  $r$ , and  $r_{kr}^b$  the village-level reproduction number from region  $k$  to  $r$ ; median and 95% credible intervals were computed.

|                                     | Post. median (95%CrI)<br>Fixed $\varphi$ | Post. median (95%CrI)<br>Flexible $\varphi$ |
|-------------------------------------|------------------------------------------|---------------------------------------------|
| $\beta_L^w$                         | 1.56 (1.26-9.45)                         | 1.58 (1.28-9.57)                            |
| $\beta_H^w$                         | 6.19 (1.85-9.73)                         | 5.94 (1.92-9.74)                            |
| $\beta_{LL}^b$ ( $\times 10^{-3}$ ) | 1.08 (0.75-1.94)                         | 1.04 (0.74-1.87)                            |
| $\beta_{LH}^b$ ( $\times 10^{-3}$ ) | 0.50 (0.08-1.05)                         | 0.51 (0.09-1.03)                            |
| $\beta_{HH}^b$ ( $\times 10^{-3}$ ) | 1.19 (0.06-3.47)                         | 1.15 (0.06-3.45)                            |
| $R_{0,L}^w$                         | 1.54 (1.24-9.35)                         | 1.56 (1.26-9.47)                            |
| $R_{0,H}^w$                         | 6.11 (1.83-9.63)                         | 5.88 (1.89-9.63)                            |
| $r_{LL}^b$                          | 1.49 (1.27-2.01)                         | 1.48 (1.26-2.00)                            |
| $r_{LH}^b$                          | 1.09 (0.20-2.36)                         | 1.14 (0.21-2.38)                            |
| $r_{HH}^b$                          | 0.32 (0.01-0.91)                         | 0.31 (0.02-0.93)                            |

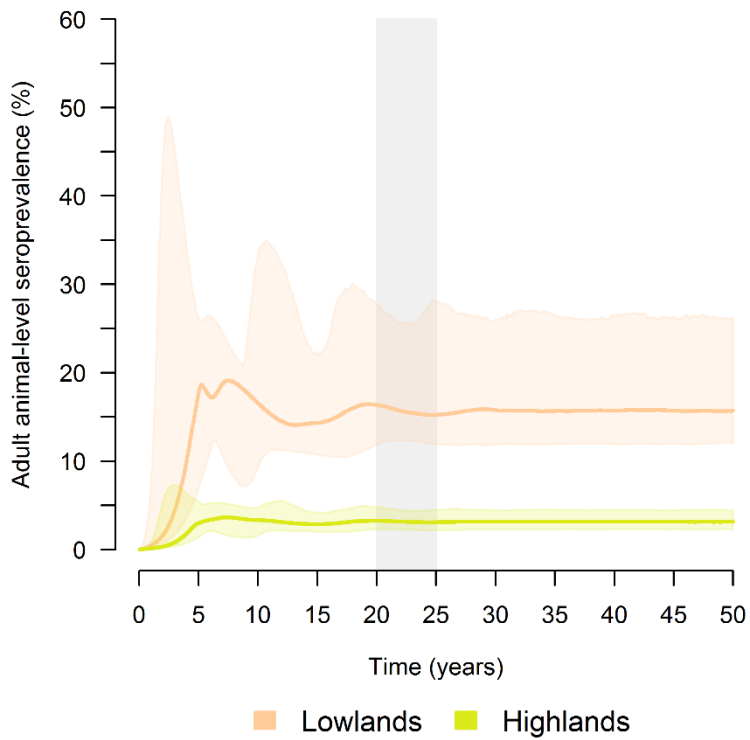

**Figure S1: Evolution of the adult animal-level seroprevalence as a function of time.** The median proportion of immune adults (solid line), 5<sup>th</sup> and 95<sup>th</sup> percentiles (coloured envelop) are shown for both highlands and lowlands; the grey shaded area corresponds to the period during which the serological survey was simulated (20-25 years) following PPRV incursion at  $t=0$ .

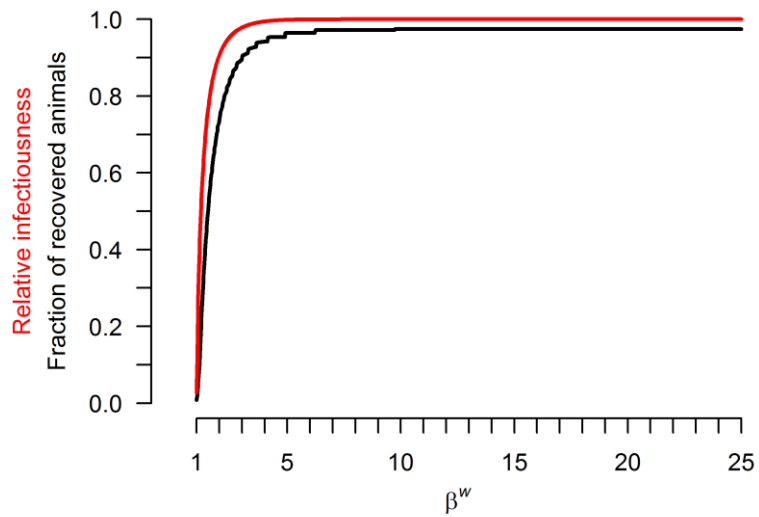

**Figure S2: Impact of changes in PPRV transmission on village infectiousness and fraction of recovered animals.**  $\beta^w$ : number of effective contacts per unit of time within a village; fraction of recovered animals: proportion of immune animals in the village population at the end of an epidemic which affected an initially fully susceptible population; the infectiousness referred to the potential of a village to infect others.

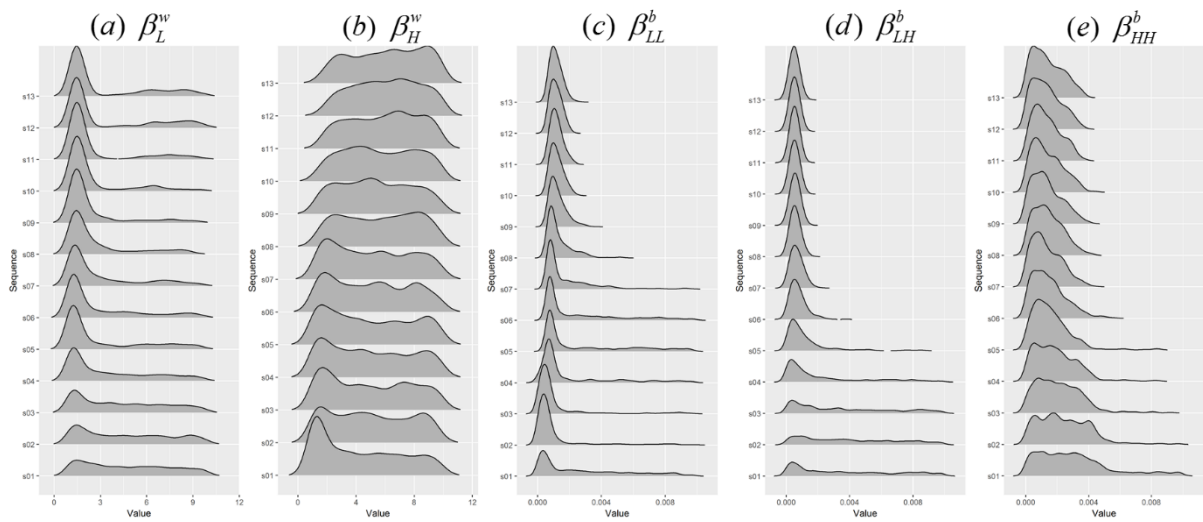

**Figure S3: Intermediate marginal posterior distributions. Under the baseline scenario.**

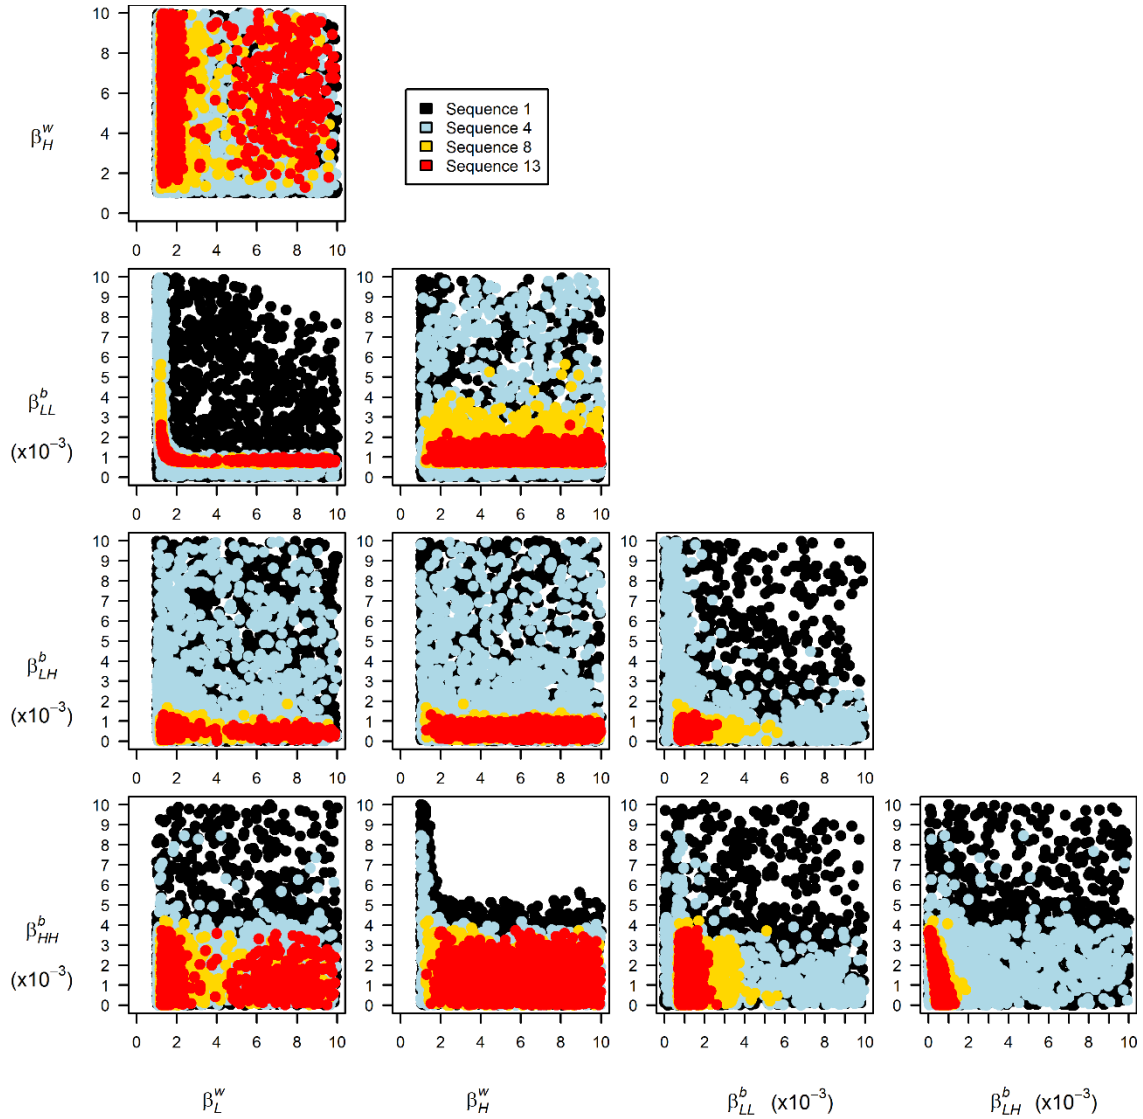

**Figure S4: Two-dimensional scatterplots of intermediate marginal posterior distributions.** Distributions were estimated under the baseline scenario. The particles from the first sequence are in black, particles from the fourth sequence in blue, particles from the eighth sequence in yellow and those from the thirtieth and last sequence in red.

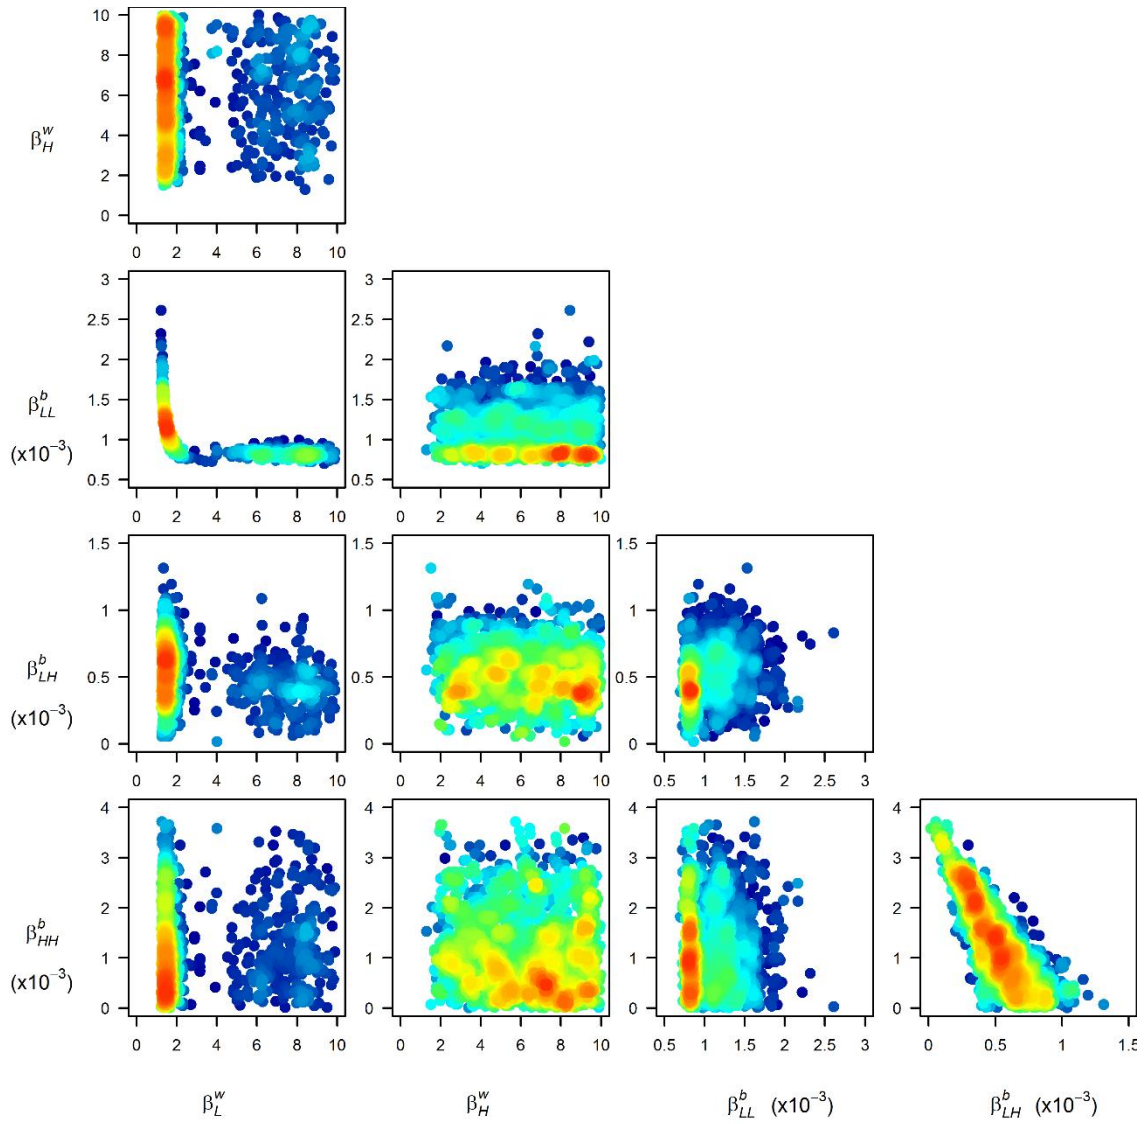

**Figure S5: Correlation between marginal posterior density distributions.** Density is represented through the colour spectrum from dark blue (low density) to red (high density); the posterior distribution was estimated under the baseline scenario.

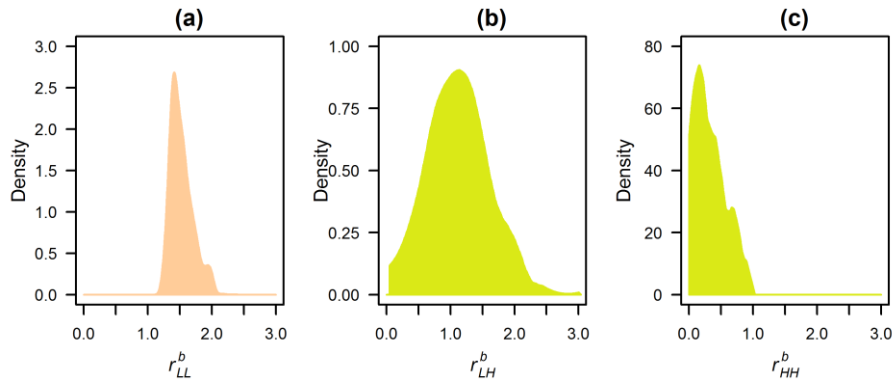

**Figure S6: Posterior predictive distribution of village-level reproduction numbers.**



## References

1. Central Statistical Authority (2003) Ethiopia - 2001-2002 Agricultural Sample Enumeration.
2. Behnke R (2010) Contribution of Livestock to the Economies of IGAD Member States Study Findings, Application of the Methodology in Ethiopia and Recommendations for Further Work, IGAD LPI Working Paper No. 02 – 10.
3. Crocker J, Geremew A, Atalie F, Yetie M, & Bartram J (2016) Teachers and sanitation promotion: an assessment of community-led total sanitation in Ethiopia. *Environmental science & technology* 50(12):6517-6525.
4. Shinn DH & Ofcansky TP (2004) *Historical Dictionary of Ethiopia* (Scarecrow Press) p 696p.
5. Yilmaz S & Venugopal V (2008) Local Government Discretion and Accountability in Ethiopia. in *International Studies Program Working Paper* (Georgia State University, Georgia, USA).
6. Central Statistical Authority (2012) 2007 Population and Housing Census of Ethiopia. (Addis Ababa, Ethiopia).
7. Hasen A (2001) Census Mapping In Ethiopia. in *Symposium on Global Review of 2000 Round of Population and Housing Censuses: Mid-Decade Assessment and Future Prospects* (New York, USA).
8. Aidenvironment (2015) SNV WASH Project in Ethiopia Final impact evaluation. (Amsterdam, The Netherlands).
9. Materia E, *et al.* (1993) Census in a rural area of Ethiopia: methodology and results. *Eur J Epidemiol* 9(1):5-9.
10. Dercon S (2016) The Ethiopian Rural Household Survey. (Centre for the study of African economies).

11. Devereux S (2006) Vulnerable Livelihoods in Somali Region, Ethiopia. (Brighton, UK).
12. Waret-Szkuta A, *et al.* (2008) Peste des petits ruminants (PPR) in Ethiopia: analysis of a national serological survey. *BMC veterinary research* 4:34.
13. Toni T, Welch D, Strelkowa N, Ipsen A, & Stumpf MP (2009) Approximate Bayesian computation scheme for parameter inference and model selection in dynamical systems. *Journal of the Royal Society, Interface / the Royal Society* 6(31):187-202.
14. Conlan AJ, *et al.* (2012) Estimating the hidden burden of bovine tuberculosis in Great Britain. *PLoS computational biology* 8(10):e1002730.
15. Brooks-Pollock E, Roberts GO, & Keeling MJ (2014) A dynamic model of bovine tuberculosis spread and control in Great Britain. *Nature* 511(7508):228-231.
16. Diekmann O & Heesterbeek JAP (2000) *Mathematical epidemiology of infectious diseases: model building, analysis and interpretation* (John Wiley & Sons, New Jersey, USA).
17. EFSA Panel on Animal Health and Welfare (2015) Scientific Opinion on peste des petits ruminants. *EFSA Journal* 13(1):3985.
18. Kivaria FM, Kwiatek O, Kapaga AM, Swai ES, Libeau G, Moshy W, Mbyuzi AO and Gladson J, (2013) The incursion, persistence and spread of peste des petits ruminants in Tanzania: epidemiological patterns and predictions. *The Onderstepoort journal of veterinary research* 80:593.
19. Mariner JC, McDermott J, Heesterbeek JA, Catley A, & Roeder P (2005) A model of lineage-1 and lineage-2 rinderpest virus transmission in pastoral areas of East Africa. *Preventive veterinary medicine* 69(3-4):245-263.
20. Albina E, *et al.* (2013) Peste des Petits Ruminants, the next eradicated animal disease? *Veterinary microbiology* 165(1-2):38-44.

21. Dhar P, *et al.* (2002) Recent epidemiology of peste des petits ruminants virus (PPRV). *Veterinary microbiology* 88(2):153-159.
22. Banyard AC, *et al.* (2010) Global distribution of peste des petits ruminants virus and prospects for improved diagnosis and control. *The Journal of general virology* 91(Pt 12):2885-2897.
23. Barrett T, Pastoret PP, & Taylor WP (2005) *Rinderpest and Peste des Petits Ruminants: Virus plagues of large and small ruminants* (Academic Press, Cambridge, USA).
24. Bazarghani TT, Charkhkar S, Doroudi J, & Bani Hassan E (2006) A review on peste des petits ruminants (PPR) with special reference to PPR in Iran. *Journal of Veterinary Medicine, Series B* 53(s1):17-18.
25. Shaila MS, Purushothaman V, Bhavasar D, Venugopal K, & Venkatesan RA (1989) Peste des petits ruminants of sheep in India. *Vet Rec* 125(24):602.
26. Abd El-Rahim IH, Sharawi SS, Barakat MR, & El-Nahas EM (2010) An outbreak of peste des petits ruminants in migratory flocks of sheep and goats in Egypt in 2006. *Rev Sci Tech* 29(3):655-662.
27. Ezeokoli CD, Umoh JU, Chineme CN, Isitor GN, & Gyang EO (1986) Clinical and epidemiological features of peste des petits ruminants in Sokoto Red goats. *Rev Elev Med Vet Pays Trop* 39(3-4):269-273.
28. Abu Elzein EM, Hassanien MM, Al-Afaleq AI, Abd Elhadi MA, & Housawi FM (1990) Isolation of peste des petits ruminants from goats in Saudi Arabia. *Vet Rec* 127(12):309-310.
29. Abegaz S, *et al.* (2000) Early growth, survival and litter size in Ethiopian Horro sheep. *South African Journal of Animal Science* 30(Supplement 1):1-3.

30. Taye M, Deribe B, & Melekot MH (2013) Reproductive Performance of Central Highland Goats under Traditional Management in Sekota District, Ethiopia. *Asian J Biol Sci* 6(6):271-276.
31. Dadi H, *et al.* (2008) Non-genetic factors influencing post-weaning growth and reproductive performances of Arsi-Bale goats. *Parity* 5(4.36):2-94.
32. Gizaw S, Tegegne A, Gebremedhin B, & Hoekstra D (2010) Sheep and goat production and marketing systems in Ethiopia: Characteristics and strategies for improvement. (Nairobi, Kenya).
33. Otte MJ & Chilonda P (2002) Cattle and small ruminant production systems in sub-Saharan Africa—A systematic review. (Livestock information sector analysis and policy branch, FAO (Food and Agriculture Organization of the United Nations), Rome, Italy).
34. Wilson RT (1989) Reproductive performance of African indigenous small ruminants under various management systems: A review. *Animal Reproduction Science* 20(4):265-286.
35. Ibrahim H (1998) *Small ruminant production techniques* (ILRI training manual. ILRI (International Livestock Research Institute), Nairobi, Kenya).
36. De Koeijer A, Diekmann O, & Reijnders P (1998) Modelling the spread of phocine distemper virus among harbour seals. *Bulletin of mathematical biology* 60:585-596.
37. Libeau G, Préhaud C, Lancelot R, Colas F, Guerre L, Bishop DH & Diallo A (1995) Development of a competitive ELISA for detecting antibodies to the peste des petits ruminants virus using a recombinant nucleoprotein. *Res Vet Sci* 58(1):50-5.
38. Beaumont MA (2010) Approximate Bayesian computation in evolution and ecology. *Annu Rev Ecol Evol Syst* 41:379-406.
